# Supplementary material for: Novel photochromic and electrochromic diarylethenes bearing triphenylamine units
Source: Royal Society of Chemistry journal article supplement (doi:10.1039/c4ra01601g), 2014-01-01
Supplement: c4ra01601g1.pdf [file c4ra01601g1.pdf]

## Supporting Information

### Novel photochromic and electrochromic diarylethenes bearing triphenylamine units

Huiyi Jin<sup>a,b</sup>, Jianhua Tian<sup>a,b</sup>, Shirong Wang<sup>\*a,b</sup>, Tingfeng Tan<sup>\*c</sup>, Yin Xiao<sup>a,b</sup> and Xianggao Li<sup>a,b</sup>

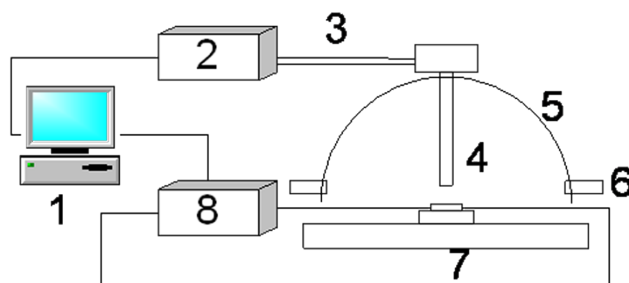

Fig. S1. System for measuring reflection spectra (1. Computer; 2. Spectrometer and Photoelectric converter; 3. Optical fiber; 4. Prober; 5. Integrating sphere; 6. Tungsten halogen lamp; 7. Sample stage; 8. DC power).
